# Supplementary material for: Faithful transfer of radiolarian silicon isotope signatures from water column to sediments in the South China Sea
Source: Copernicus journal article supplement (doi:10.5194/egusphere-2024-3686), 2024-12-09
Supplement: Supplementary file 1 [file egusphere-2024-3686-supplement.pdf]

Table S1 Information on sampling stations and radiolarian silicon isotopes ( $\delta^{30}\text{Si}_{\text{rad}}$ ) in plankton samples and surface sediments

| Station | Longitude | Latitude | Water depth (m) | Sampling depth (m) | Sampling time           | $\delta^{30}\text{Si}_{\text{rad}}$ (‰ $\pm 2\text{SD}^{\text{a}}$ ) |                 |                   |
|---------|-----------|----------|-----------------|--------------------|-------------------------|----------------------------------------------------------------------|-----------------|-------------------|
|         |           |          |                 |                    |                         | 0-100 m                                                              | 100-300 m       | surface sediments |
| 7       | 114.49 E  | 19.75 N  | 944             | 0-100, 100-300     | 2016-09-13, 13:30-14:55 | 1.81 $\pm 0.20$                                                      | No data         | 1.85 $\pm 0.21$   |
| 8       | 114.09 E  | 19.46 N  | 706             | 0-100, 100-300     | 2016-09-14, 10:50-12:10 | 1.75 $\pm 0.20$                                                      | No data         | 1.61 $\pm 0.10$   |
| 10      | 112.03 E  | 18.06 N  | 2444            | 0-100, 100-300     | 2021.8.13, 21:00-22:30  | No data                                                              | 1.56 $\pm 0.20$ | 1.61 $\pm 0.10$   |
| 11      | 113.46 E  | 18.17 N  | 2384            | 0-100, 100-300     | 2021.8.14, 20:21-21:45  | No data                                                              | 1.83 $\pm 0.20$ | 1.82 $\pm 0.20$   |
| 12      | 114.15 E  | 18.06 N  | 3497            | 0-100, 100-300     | 2021.8.15, 0:20-2:10    | No data                                                              | 1.77 $\pm 0.20$ | 1.79 $\pm 0.21$   |
| 13      | 114.42 E  | 17.59 N  | 3561            | 0-100, 100-300     | 2021.8.10, 12:30-14:10  | 1.80 $\pm 0.20$                                                      | No data         | 1.83 $\pm 0.20$   |
| 28      | 114.10 E  | 10.05 N  | 1734            | 0-100, 100-300     | 2020.11.03, 10:10-11:50 | 1.68 $\pm 0.20$                                                      | No data         | 1.63 $\pm 0.20$   |

<sup>a</sup> SD is the standard deviation estimated from the repeated standard bracketing measurements of a single sample solution.

Table S2 Wilcoxon signed-rank tests for relative abundances of prominent radiolarian species between depths of 0-100 m and 100-300 m, and between the 0-100 m water column and surface sediments (SS) at each station.

|                           | Station 7<br>(100-300 m) | Station 7<br>SS-       | Station 8<br>(100-300 m) | Station 8<br>SS -      | Station 10<br>(100-300 m) | Station 10<br>SS -      | Station 11<br>(100-300m)  | Station 11<br>SS -      | Station 12<br>(100-300 m) | Station 12<br>SS -      | Station 13<br>(100-300 m) | Station 13<br>SS -      | Station 28<br>(100-300 m) - | Station 28<br>SS -      |
|---------------------------|--------------------------|------------------------|--------------------------|------------------------|---------------------------|-------------------------|---------------------------|-------------------------|---------------------------|-------------------------|---------------------------|-------------------------|-----------------------------|-------------------------|
|                           | - Station 7<br>(0-100 m) | Station 7<br>(0-100 m) | - Station 8<br>(0-100 m) | Station 8<br>(0-100 m) | - Station 10<br>(0-100 m) | Station 10<br>(0-100 m) | - Station 11<br>(0-100 m) | Station 11<br>(0-100 m) | - Station 12<br>(0-100 m) | Station 12<br>(0-100 m) | - Station 13<br>(0-100 m) | Station 13<br>(0-100 m) | Station 28<br>(0-100 m)     | Station 28<br>(0-100 m) |
| Z                         | -.175 <sup>a</sup>       | -.500 <sup>a</sup>     | -.172 <sup>b</sup>       | -.081 <sup>a</sup>     | -.256 <sup>b</sup>        | -.200 <sup>a</sup>      | -.356 <sup>b</sup>        | -.584 <sup>a</sup>      | -1.005 <sup>a</sup>       | -1.315 <sup>a</sup>     | -.808 <sup>a</sup>        | -.915 <sup>a</sup>      | -.027 <sup>b</sup>          | -.243 <sup>a</sup>      |
| Asymp. Sig.<br>(2-tailed) | 0.861                    | 0.617                  | 0.864                    | 0.935                  | 0.798                     | 0.841                   | 0.722                     | 0.559                   | 0.315                     | 0.188                   | 0.419                     | 0.360                   | 0.979                       | 0.808                   |

SS = surface sediments, <sup>a</sup> Based on negative ranks, <sup>b</sup> Based on positive ranks

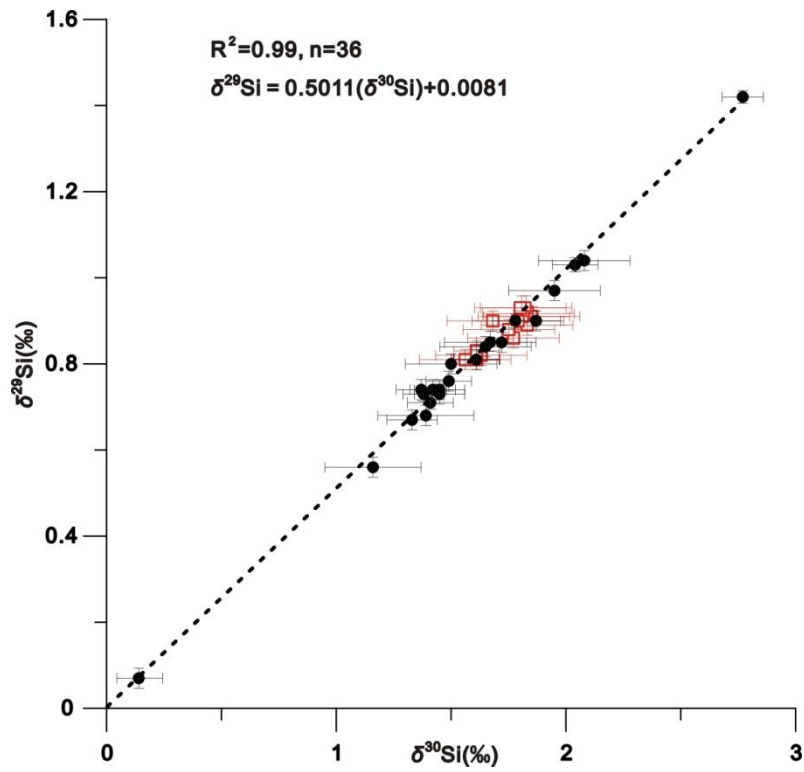

Figure S1 Scatter plot of  $\delta^{29}\text{Si}$  and  $\delta^{30}\text{Si}$  values of radiolarian tests. The black dashed line indicates the expected mass-dependent fractionation line of  $\delta^{29}\text{Si} = 0.51 \times \delta^{30}\text{Si}$  (Reynolds et al., 2007). Horizontal and vertical bars represent the analytical uncertainty ( $2\sigma$ ). Red squares represent the radiolarian silicon isotope data ( $n = 14$ ) from this study, while black dots represent unpublished radiolarian silicon isotope data ( $n = 22$ ) from the same analytical batch.
